# Supplementary material
Source: Springer Nature journal article supplement (https://www.springermedizin.de/resource/supplementary/12883_2013_1009_MOESM3_ESM.pdf/9456644)

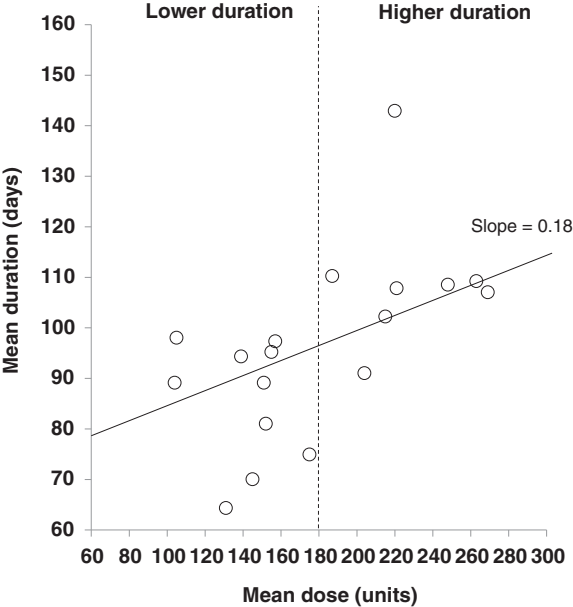

Supplement: MOESM3 [file 9456644]
